# Supplementary material
Source: bioRxiv or medRxiv preprint supplement (https://www.biorxiv.org/highwire/filestream/66494/field_highwire_adjunct_files/3/217646-4.pdf)
Supplement: Supplementary file [file 217646-4.pdf]

Supplementary Fig.3 The 6mA quantification data in *P. sojae* and *P. infestans* using UPLC-ESI-MS/MS by three replicates.

| Sample              | Rep1(p.p.m) | Rep2(p.p.m) | Rep3(p.p.m) | average  | % <i>P. sojae</i><br>WT | STDEV  |
|---------------------|-------------|-------------|-------------|----------|-------------------------|--------|
| <i>P. sojae</i>     | 337.5840607 | 454.6034864 | 448.414235  | 413.5339 | 100                     | 65.84  |
| <i>P. infestans</i> | 550.2369315 | 648.7194895 | 308.9952665 | 502.6521 | 121.5504                | 174.78 |

Supplementary Fig. 4 A brief summarize of the mutations of each *psdamt1*, *psdamt2*, *psdamt3* mutant.

| <b>Mutant</b>        | <b>Mode of destruction</b> | <b>Sequence change</b>      |
|----------------------|----------------------------|-----------------------------|
| <i>psdamt1</i> -T21  | Frame shift                | -139bp(homozygote)          |
| <i>psdamt1</i> -T50  | Frame shift                | -1bp(homozygote)            |
| <i>psdamt1</i> -T115 | Frame shift                | -5bp/-1bp                   |
| <i>psdamt2</i> -T10  | HDR mediated replacement   | RFP replace(homozygote)     |
| <i>psdamt2</i> -T18  | HDR mediated replacement   | RFP replace(homozygote)     |
| <i>psdamt2</i> -T52  | Frame shift                | -1(homozygote)              |
| <i>psdamt3</i> -T3   | Frame shift                | -373bp(homozygote)          |
| <i>psdamt3</i> -T9   | Frame shift                | -374bp(homozygote)          |
| <i>psdamt3</i> -T16  | Frame shift                | Insertion, +1bp(homozygote) |

Supplementary Fig. 5 6mA quantification data in *P. sojae* DAMT mutants using UPLC-ESI-MS/MS by three replicates.

| <b>Sample</b>       | <b>Rep1(p.p.m)</b> | <b>Rep2(p.p.m)</b> | <b>Rep3(p.p.m)</b> | <b>average</b> | <b>%<i>P. sojae</i> WT</b> | <b>STDEV</b> |
|---------------------|--------------------|--------------------|--------------------|----------------|----------------------------|--------------|
| <i>psdamt1</i> -T21 | 10.84669284        | 49.71184699        | 40.20488338        | 33.58781       | 8.122%                     | 20.25        |
| <i>psdamt2</i> -T52 | 19.38117836        | 26.94702479        | 25.2741907         | 23.86746       | 5.771%                     | 3.97         |
| <i>psdamt3</i> -T9  | 62.84280234        | 31.04520473        | 42.37781976        | 45.42194       | 10.983%                    | 16.11        |
